# Supplementary material for: Insulin-like growth factor receptor and sphingosine kinase are prognostic and therapeutic targets in breast cancer
Source: PubMed Central journal article supplement (PMC5718000; doi:10.1186/s12885-017-3809-0), 2017-12-05
Supplement: 12885_2017_3809_MOESM1_ESM.pdf [file 12885_2017_3809_MOESM1_ESM.pdf]

Supplementary Table 1: Full dataset used in survival analyses (page 1)

| Patient ID | Followup (months) | OS | BrCa Events | IGF1R Score | IGF1R bin ‡ | pIGF1R Score | pIGF1R bin ‡ | SphK Score | SphK bin ‡ | IGF1R-SphK Comb ❖ | pIGF1R-SphK Comb ❖ | ER status | PR status | HER2 status | Anti-estrogen therapy (AET) | AET-IGF1R | AET-SphK | AET-IGF1R-SphK |
|------------|-------------------|----|-------------|-------------|-------------|--------------|--------------|------------|------------|-------------------|--------------------|-----------|-----------|-------------|-----------------------------|-----------|----------|----------------|
| 01-06-010  | 106               | 0  | 0           | 0           | 0           | 1            | 0            | 2          | 1          | 0                 | 0                  | Positive  | Negative  | Positive    | 0                           | 0         | 0        | 0              |
| 01-06-028  | 80                | 1  | 1           | 1           | 0           | 0            | 0            | 2          | 1          | 0                 | 0                  | Negative  | Negative  | Positive    | 0                           | 0         | 0        | 0              |
| 01-06-033  | 96                | 0  | 0           | 0           | 0           | 0            | 0            | 0          | 0          | 0                 | 0                  | Positive  | Positive  | Negative    | 1                           | 0         | 0        | 0              |
| 01-06-036  | 100               | 0  | 0           | 0           | 0           | 0            | 0            | 1          | 0          | 0                 | 0                  | Positive  | Positive  | Positive    | 1                           | 0         | 0        | 0              |
| 01-06-048  | 104               | 0  | 0           | 1           | 0           | 0            | 0            | 2          | 1          | 0                 | 0                  | Negative  | Negative  | Positive    | 0                           | 0         | 0        | 0              |
| 01-06-056  | 103               | 0  | 0           | 0           | 0           | 0            | 0            | 1          | 0          | 0                 | 0                  | Positive  | Positive  | Positive    | 1                           | 0         | 0        | 0              |
| 01-06-058  | 74                | 0  | 0           | 0           | 0           | 2            | 1            | 2          | 1          | 0                 | 1                  | Negative  | Negative  | Negative    | 0                           | 0         | 0        | 0              |
| 01-06-061  | 61                | 1  | 0           | 0           | 0           | 0            | 0            | 0          | 0          | 0                 | 0                  | Negative  | Negative  | Positive    | 0                           | 0         | 0        | 0              |
| 01-06-063  | 101               | 0  | 0           | 2           | 1           | 0            | 0            | 0          | 0          | 0                 | 0                  | Positive  | Positive  | Negative    | 1                           | 1         | 0        | 0              |
| 01-06-066  | 95                | 0  | 0           | 0           | 0           | 2            | 1            | 0          | 0          | 0                 | 0                  | Negative  | Positive  | Negative    | 0                           | 0         | 0        | 0              |
| 01-06-074  | 95                | 1  | 0           | 1           | 0           | 0            | 0            | 0          | 0          | 0                 | 0                  | Positive  | Positive  | Negative    | 1                           | 0         | 0        | 0              |
| 01-06-086  | 97                | 0  | 0           | 1           | 0           | 1            | 0            | 1          | 0          | 0                 | 0                  | Positive  | Positive  | Negative    | 0                           | 0         | 0        | 0              |
| 01-06-087  | 101               | 0  | 0           | 1           | 0           | 0            | 0            | 2          | 1          | 0                 | 0                  | Positive  | Positive  | Negative    | 1                           | 0         | 1        | 0              |
| 01-06-093  | 96                | 0  | 0           | 2           | 1           | 0            | 0            | 0          | 0          | 0                 | 0                  | Positive  | Positive  | Negative    | ❖                           | ❖         | ❖        | ❖              |
| 01-06-099  | 88                | 0  | 0           | 1           | 0           | 0            | 0            | 0          | 0          | 0                 | 0                  | Positive  | Positive  | Negative    | 1                           | 0         | 0        | 0              |
| 01-06-100  | 56                | 1  | 1           | 0           | 0           | 0            | 0            | 0          | 0          | 0                 | 0                  | Positive  | Positive  | Positive    | 1                           | 0         | 0        | 0              |
| 01-06-105  | 28                | 1  | 1           | 0           | 0           | 0            | 0            | 1          | 0          | 0                 | 0                  | Negative  | Negative  | Positive    | ❖                           | ❖         | ❖        | ❖              |
| 01-06-106  | 18                | 1  | 1           | 1           | 0           | 0            | 0            | 2          | 1          | 0                 | 0                  | Negative  | Positive  | Positive    | 0                           | 0         | 0        | 0              |
| 01-06-110  | 95                | 0  | 0           | 1           | 0           | 1            | 0            | 3          | 1          | 0                 | 0                  | Negative  | Negative  | Negative    | ❖                           | ❖         | ❖        | ❖              |
| 01-06-111  | 97                | 0  | 0           | 2           | 1           | 0            | 0            | 2          | 1          | 1                 | 0                  | Positive  | Positive  | Negative    | 1                           | 1         | 1        | 1              |
| 01-07-003  | 73                | 0  | 0           | 1           | 0           | 0            | 0            | 1          | 0          | 0                 | 0                  | Negative  | Positive  | Positive    | 0                           | 0         | 0        | 0              |
| 01-07-019  | 61                | 0  | 0           | 0           | 0           | 0            | 0            | 3          | 1          | 0                 | 0                  | Negative  | Negative  | Negative    | 0                           | 0         | 0        | 0              |
| 01-07-025  | 55                | 0  | 0           | 1           | 0           | 1            | 0            | 2          | 1          | 0                 | 0                  | Negative  | Negative  | Positive    | 0                           | 0         | 0        | 0              |
| 01-07-028  | 62                | 0  | 0           | 1           | 0           | 3            | 1            | 2          | 1          | 0                 | 1                  | Positive  | Positive  | Positive    | 1                           | 0         | 1        | 0              |
| 01-07-029  | 65                | 0  | 0           | 1           | 0           | 0            | 0            | 1          | 0          | 0                 | 0                  | Negative  | Negative  | Positive    | ❖                           | ❖         | ❖        | ❖              |
| 01-07-036  | 60                | 0  | 0           | 1           | 0           | 0            | 0            | 2          | 1          | 0                 | 0                  | Negative  | Negative  | Positive    | ❖                           | ❖         | ❖        | ❖              |
| 01-07-038  | 60                | 0  | 0           | 1           | 0           | 0            | 0            | 0          | 0          | 0                 | 0                  | Positive  | Positive  | Negative    | 1                           | 0         | 0        | 0              |
| 01-07-040  | 54                | 0  | 0           | 2           | 1           | 1            | 0            | 3          | 1          | 1                 | 0                  | Positive  | Positive  | Positive    | 1                           | 1         | 1        | 1              |
| 01-07-042  | 61                | 0  | 0           | 0           | 0           | 0            | 0            | 1          | 0          | 0                 | 0                  | Positive  | Positive  | Negative    | ❖                           | ❖         | ❖        | ❖              |
| 01-07-043  | 30                | 1  | 0           | 0           | 0           | 0            | 0            | 2          | 1          | 0                 | 0                  | Positive  | Positive  | Positive    | 0                           | 0         | 0        | 0              |
| 01-07-045  | 23                | 0  | 0           | 0           | 0           | 2            | 1            | 1          | 0          | 0                 | 0                  | Positive  | Positive  | Negative    | 1                           | 0         | 0        | 0              |
| 01-07-052  | 62                | 0  | 0           | 0           | 0           | 0            | 0            | 1          | 0          | 0                 | 0                  | Negative  | Negative  | Negative    | ❖                           | ❖         | ❖        | ❖              |
| 01-07-053  | 60                | 0  | 0           | 2           | 1           | 0            | 0            | 2          | 1          | 1                 | 0                  | Positive  | Positive  | Negative    | 1                           | 1         | 1        | 1              |
| 01-07-061  | 68                | 0  | 0           | 1           | 0           | 2            | 1            | 3          | 1          | 0                 | 1                  | Positive  | Positive  | Negative    | ❖                           | ❖         | ❖        | ❖              |
| 01-07-064  | 72                | 0  | 1           | 2           | 1           | 2            | 1            | 3          | 1          | 1                 | 1                  | Positive  | Positive  | Negative    | ❖                           | ❖         | ❖        | ❖              |
| 01-07-073  | 68                | 0  | 0           | 2           | 1           | 0            | 0            | 2          | 1          | 1                 | 0                  | Negative  | Negative  | Negative    | 0                           | 0         | 0        | 0              |
| 01-07-080  | 62                | 0  | 0           | 1           | 0           | 0            | 0            | 2          | 1          | 0                 | 0                  | Negative  | Negative  | Negative    | ❖                           | ❖         | ❖        | ❖              |
| 01-07-086  | 63                | 0  | 0           | 0           | 0           | 0            | 0            | 1          | 0          | 0                 | 0                  | Positive  | Positive  | Positive    | ❖                           | ❖         | ❖        | ❖              |
| 01-07-087  | 70                | 1  | 1           | 0           | 0           | 0            | 0            | 2          | 1          | 0                 | 0                  | Positive  | Negative  | Negative    | 1                           | 0         | 1        | 0              |
| 01-07-088  | 90                | 0  | 0           | 0           | 0           | 2            | 1            | 1          | 0          | 0                 | 0                  | Positive  | Positive  | ❖           | 1                           | 0         | 0        | 0              |
| 01-07-091  | 54                | 0  | 1           | 1           | 0           | 0            | 0            | 1          | 0          | 0                 | 0                  | Positive  | Positive  | Negative    | ❖                           | ❖         | ❖        | ❖              |
| 01-07-092  | 58                | 0  | 0           | 0           | 0           | 0            | 0            | 1          | 0          | 0                 | 0                  | Positive  | Positive  | Positive    | ❖                           | ❖         | ❖        | ❖              |
| 01-07-095  | 60                | 0  | 0           | 1           | 0           | 0            | 0            | 2          | 1          | 0                 | 0                  | Positive  | Negative  | Positive    | ❖                           | ❖         | ❖        | ❖              |
| 01-07-099  | 56                | 0  | 0           | 1           | 0           | 1            | 0            | 2          | 1          | 0                 | 0                  | Positive  | Positive  | Negative    | ❖                           | ❖         | ❖        | ❖              |
| 01-07-106  | 60                | 0  | 0           | 0           | 0           | 0            | 0            | 0          | 0          | 0                 | 0                  | Positive  | Positive  | Negative    | ❖                           | ❖         | ❖        | ❖              |
| 01-07-111  | 52                | 0  | 0           | 1           | 0           | 0            | 0            | 0          | 0          | 0                 | 0                  | Positive  | Positive  | Negative    | 1                           | 0         | 0        | 0              |
| 01-07-112  | 55                | 0  | 0           | 0           | 0           | 0            | 0            | 1          | 0          | 0                 | 0                  | Positive  | Negative  | Positive    | 1                           | 0         | 0        | 0              |
| 01-07-117  | 26                | 0  | 0           | 1           | 0           | 1            | 0            | 0          | 0          | 0                 | 0                  | Positive  | Positive  | Positive    | 1                           | 0         | 0        | 0              |

Supplementary Table 1: Full dataset used in survival analyses (page 2)

| Patient ID | Followup (months) | OS | BrCa Events | IGF1R Score | IGF1R bin ‡ | pIGF1R Score | pIGF1R bin ‡ | SphK Score | SphK bin ‡ | IGF1R-SphK Comb ❖ | pIGF1R-SphK Comb ❖ | ER status | PR status | HER2 status | Anti-estrogen therapy (AET) | AET-IGF1R | AET-SphK | AET-IGF1R-SphK |
|------------|-------------------|----|-------------|-------------|-------------|--------------|--------------|------------|------------|-------------------|--------------------|-----------|-----------|-------------|-----------------------------|-----------|----------|----------------|
| 01-07-120  | 53                | 0  | 0           | 2           | 1           | 2            | 1            | 1          | 0          | 0                 | 0                  | Positive  | Positive  | Negative    | 1                           | 1         | 0        | 0              |
| 01-07-123  | 56                | 0  | 0           | 1           | 0           | 0            | 0            | 1          | 0          | 0                 | 0                  | Positive  | Positive  | Positive    | ✖                           | ✖         | ✖        | ✖              |
| 01-08-002  | 64                | 0  | 0           | 3           | 1           | 0            | 0            | 3          | 1          | 1                 | 0                  | Positive  | Positive  | Negative    | 1                           | 1         | 1        | 1              |
| 01-08-009  | 28                | 1  | 0           | 0           | 0           | 0            | 0            | 0          | 0          | 0                 | 0                  | Positive  | Positive  | Positive    | 0                           | 0         | 0        | 0              |
| 01-08-016  | 63                | 0  | 0           | 0           | 0           | 0            | 0            | 2          | 1          | 0                 | 0                  | Negative  | Negative  | Negative    | 0                           | 0         | 0        | 0              |
| 01-08-018  | 60                | 0  | 0           | 0           | 0           | 0            | 0            | 0          | 0          | 0                 | 0                  | Negative  | Equivoca  | Positive    | 0                           | 0         | 0        | 0              |
| 01-08-022  | 72                | 0  | 0           | 3           | 1           | 0            | 0            | 2          | 1          | 1                 | 0                  | Positive  | Positive  | Positive    | 1                           | 1         | 1        | 1              |
| 01-08-023  | 64                | 0  | 0           | 1           | 0           | 0            | 0            | 3          | 1          | 0                 | 0                  | Positive  | Positive  | Negative    | 1                           | 0         | 1        | 0              |
| 01-08-024  | 59                | 0  | 0           | 1           | 0           | 0            | 0            | 2          | 1          | 0                 | 0                  | Positive  | Positive  | Positive    | 1                           | 0         | 1        | 0              |
| 01-08-026  | 60                | 0  | 0           | 0           | 0           | 1            | 0            | 2          | 1          | 0                 | 0                  | Negative  | Negative  | Negative    | 0                           | 0         | 0        | 0              |
| 01-08-033  | 61                | 0  | 0           | 2           | 1           | 0            | 0            | 1          | 0          | 0                 | 0                  | Negative  | Negative  | Positive    | 0                           | 0         | 0        | 0              |
| 01-08-039  | 72                | 0  | 0           | 1           | 0           | 0            | 0            | 2          | 1          | 0                 | 0                  | Negative  | Positive  | Positive    | 0                           | 0         | 0        | 0              |
| 01-08-055  | 61                | 0  | 0           | 0           | 0           | 0            | 0            | 2          | 1          | 0                 | 0                  | Negative  | Positive  | Negative    | ✖                           | ✖         | ✖        | ✖              |
| 01-08-057  | 73                | 0  | 0           | 0           | 0           | 2            | 1            | 2          | 1          | 0                 | 1                  | Positive  | Positive  | Positive    | 0                           | 0         | 0        | 0              |
| 01-08-059  | 63                | 0  | 0           | 0           | 0           | 2            | 1            | 3          | 1          | 0                 | 1                  | Negative  | Negative  | Negative    | 0                           | 0         | 0        | 0              |
| 01-08-060  | 61                | 0  | 0           | 0           | 0           | 0            | 0            | 2          | 1          | 0                 | 0                  | Negative  | Negative  | Negative    | ✖                           | ✖         | ✖        | ✖              |
| 01-08-084  | 44                | 0  | 0           | 1           | 0           | 0            | 0            | 2          | 1          | 0                 | 0                  | Negative  | Positive  | Positive    | 1                           | 0         | 1        | 0              |
| 01-08-090  | 55                | 0  | 0           | 1           | 0           | 0            | 0            | 3          | 1          | 0                 | 0                  | Positive  | Positive  | Positive    | 1                           | 0         | 1        | 0              |
| 01-08-101  | 61                | 0  | 0           | 1           | 0           | 0            | 0            | 2          | 1          | 0                 | 0                  | Negative  | Negative  | Positive    | 0                           | 0         | 0        | 0              |
| 01-08-102  | 61                | 0  | 1           | 2           | 1           | 0            | 0            | 2          | 1          | 1                 | 0                  | Positive  | Negative  | Positive    | 0                           | 0         | 0        | 0              |
| 01-08-108  | 61                | 0  | 0           | 2           | 1           | 0            | 0            | 2          | 1          | 1                 | 0                  | Positive  | Positive  | Positive    | 1                           | 1         | 1        | 1              |
| 01-08-112  | 27                | 0  | 0           | 0           | 0           | 0            | 0            | 2          | 1          | 0                 | 0                  | Positive  | Positive  | Positive    | 0                           | 0         | 0        | 0              |
| 01-08-120  | 61                | 0  | 0           | 1           | 0           | 0            | 0            | 3          | 1          | 0                 | 0                  | Negative  | Negative  | Positive    | 0                           | 0         | 0        | 0              |
| 01-08-138  | 35                | 1  | 1           | 0           | 0           | 0            | 0            | 2          | 1          | 0                 | 0                  | Negative  | Negative  | Positive    | 0                           | 0         | 0        | 0              |
| 01-08-142  | 60                | 0  | 0           | 2           | 1           | 1            | 0            | 3          | 1          | 1                 | 0                  | Negative  | Negative  | Negative    | 0                           | 0         | 0        | 0              |
| 01-08-148  | 53                | 0  | 0           | 1           | 0           | 0            | 0            | 2          | 1          | 0                 | 0                  | Negative  | Negative  | Positive    | 0                           | 0         | 0        | 0              |
| 01-08-152  | 66                | 1  | 1           | 0           | 0           | 0            | 0            | 2          | 1          | 0                 | 0                  | Negative  | Equivoca  | Positive    | 1                           | 0         | 1        | 0              |
| 01-08-159  | 50                | 0  | 0           | 1           | 0           | 1            | 0            | 3          | 1          | 0                 | 0                  | Negative  | Negative  | Positive    | 0                           | 0         | 0        | 0              |
| 01-09-029  | 59                | 0  | 0           | 0           | 0           | 0            | 0            | 3          | 1          | 0                 | 0                  | Negative  | Negative  | Negative    | ✖                           | ✖         | ✖        | ✖              |
| 01-09-031  | 59                | 0  | 0           | 3           | 1           | 0            | 0            | 3          | 1          | 1                 | 0                  | Positive  | Positive  | Negative    | 1                           | 1         | 1        | 1              |
| 01-09-040  | 26                | 0  | 0           | 0           | 0           | 0            | 0            | 3          | 1          | 0                 | 0                  | Positive  | Positive  | Negative    | 1                           | 0         | 1        | 0              |
| 01-09-045  | 61                | 0  | 0           | 0           | 0           | 0            | 0            | 2          | 1          | 0                 | 0                  | Negative  | Negative  | Negative    | 0                           | 0         | 0        | 0              |
| 01-09-050  | 61                | 1  | 0           | 0           | 0           | 0            | 0            | 3          | 1          | 0                 | 0                  | Negative  | Negative  | Negative    | ✖                           | ✖         | ✖        | ✖              |
| 01-09-053  | 70                | 0  | 0           | 0           | 0           | 0            | 0            | 3          | 1          | 0                 | 0                  | Negative  | Negative  | Negative    | 0                           | 0         | 0        | 0              |
| 01-09-067  | 137               | 0  | 0           | 0           | 0           | 0            | 0            | 3          | 1          | 0                 | 0                  | Negative  | Negative  | Negative    | ✖                           | ✖         | ✖        | ✖              |
| 01-09-069  | 8                 | 0  | 0           | 2           | 1           | 1            | 0            | 3          | 1          | 1                 | 0                  | Positive  | Positive  | Negative    | ✖                           | ✖         | ✖        | ✖              |
| 01-09-070  | 66                | 0  | 0           | 0           | 0           | 0            | 0            | 2          | 1          | 0                 | 0                  | Negative  | Negative  | Negative    | ✖                           | ✖         | ✖        | ✖              |
| 01-09-113  | 37                | 0  | 0           | 0           | 0           | 0            | 0            | 2          | 1          | 0                 | 0                  | Negative  | Negative  | Negative    | 0                           | 0         | 0        | 0              |
| 01-09-130  | 63                | 0  | 0           | 1           | 0           | 0            | 0            | 3          | 1          | 0                 | 0                  | Positive  | Positive  | Negative    | 1                           | 0         | 1        | 0              |
| 01-09-140  | 65                | 0  | 0           | 0           | 0           | 2            | 1            | 2          | 1          | 0                 | 1                  | Negative  | Negative  | Negative    | ✖                           | ✖         | ✖        | ✖              |
| 02-07-014  | 60                | 0  | 0           | 3           | 1           | 2            | 1            | 1          | 0          | 0                 | 0                  | Positive  | Positive  | ✖           | 1                           | 1         | 0        | 0              |
| 02-07-031  | 325               | 0  | 0           | 2           | 1           | 2            | 1            | 2          | 1          | 1                 | 1                  | Negative  | Negative  | ✖           | 0                           | 0         | 0        | 0              |
| 02-08-006  | 65                | 0  | 0           | 0           | 0           | 0            | 0            | 3          | 1          | 0                 | 0                  | Negative  | Negative  | Negative    | 0                           | 0         | 0        | 0              |
| 02-09-021  | 65                | 0  | 0           | 1           | 0           | 2            | 1            | 3          | 1          | 0                 | 1                  | Positive  | Positive  | Negative    | 1                           | 0         | 1        | 0              |
| 02-09-037  | 64                | 0  | 0           | 1           | 0           | 1            | 0            | 3          | 1          | 0                 | 0                  | Positive  | Positive  | Negative    | 0                           | 0         | 0        | 0              |
| 02-09-050  | 60                | 0  | 0           | 0           | 0           | 2            | 1            | 2          | 1          | 0                 | 0                  | Positive  | Positive  | Negative    | 0                           | 0         | 0        | 0              |
| 02-09-066  | 60                | 0  | 0           | 0           | 0           | 2            | 1            | 3          | 1          | 0                 | 1                  | Positive  | Positive  | Negative    | 1                           | 0         | 1        | 0              |
| 03-06-004  | 89                | 0  | 0           | 0           | 0           | 0            | 0            | 1          | 0          | 0                 | 0                  | Negative  | Negative  | Negative    | 0                           | 0         | 0        | 0              |

Supplementary Table 1: Full dataset used in survival analyses (page 3)

| Patient ID | Followup (months) | OS | BrCa Events | IGF1R Score | IGF1R bin ‡ | pIGF1R Score | pIGF1R bin ‡ | SphK Score | SphK bin ‡ | IGF1R-SphK Comb ❖ | pIGF1R-SphK Comb ❖ | ER status | PR status | HER2 status | Anti-estrogen therapy (AET) | AET-IGF1R | AET-SphK | AET-IGF1R-SphK |
|------------|-------------------|----|-------------|-------------|-------------|--------------|--------------|------------|------------|-------------------|--------------------|-----------|-----------|-------------|-----------------------------|-----------|----------|----------------|
| 03-06-007  | 98                | 0  | 0           | 3           | 1           | 1            | 0            | 3          | 1          | 1                 | 0                  | Positive  | Positive  | Negative    | 1                           | 1         | 1        | 1              |
| 03-06-008  | 100               | 0  | 0           | 2           | 1           | ✖            | ✖            | 3          | 1          | 1                 | ✖                  | Positive  | Positive  | Negative    | 1                           | 1         | 1        | 1              |
| 03-06-019  | 51                | 0  | 0           | 2           | 1           | 0            | 0            | 3          | 1          | 1                 | 0                  | Positive  | Positive  | Negative    | ✖                           | ✖         | ✖        | ✖              |
| 03-06-021  | 97                | 0  | 0           | 2           | 1           | 0            | 0            | 2          | 1          | 1                 | 0                  | Positive  | Positive  | Negative    | 1                           | 1         | 1        | 1              |
| 03-06-022  | 95                | 0  | 0           | 2           | 1           | 0            | 0            | 3          | 1          | 1                 | 0                  | Positive  | Positive  | Negative    | ✖                           | ✖         | ✖        | ✖              |
| 03-06-024  | 58                | 0  | 1           | 2           | 1           | 1            | 0            | 1          | 0          | 0                 | 0                  | Positive  | Positive  | Negative    | 1                           | 1         | 0        | 0              |
| 03-06-026  | 92                | 0  | 0           | 1           | 0           | 1            | 0            | 0          | 0          | 0                 | 0                  | Positive  | Positive  | Positive    | 1                           | 0         | 0        | 0              |
| 03-06-028  | 88                | 0  | 0           | 0           | 0           | 0            | 0            | 1          | 0          | 0                 | 0                  | Positive  | Positive  | Negative    | 1                           | 0         | 0        | 0              |
| 03-06-033  | 96                | 0  | 0           | 1           | 0           | 0            | 0            | 0          | 0          | 0                 | 0                  | Positive  | Positive  | Positive    | 1                           | 0         | 0        | 0              |
| 03-06-035  | 96                | 0  | 0           | 2           | 1           | 0            | 0            | 2          | 1          | 1                 | 0                  | Positive  | Positive  | Negative    | 1                           | 1         | 1        | 1              |
| 03-06-036  | 97                | 0  | 0           | 3           | 1           | 0            | 0            | 2          | 1          | 1                 | 0                  | Positive  | Positive  | Negative    | 1                           | 1         | 1        | 1              |
| 03-06-037  | 93                | 0  | 0           | 2           | 1           | 1            | 0            | 0          | 0          | 0                 | 0                  | Positive  | Positive  | Negative    | 1                           | 1         | 0        | 0              |
| 03-06-039  | 92                | 0  | 0           | 1           | 0           | 0            | 0            | 3          | 1          | 0                 | 0                  | Negative  | Negative  | Negative    | ✖                           | ✖         | ✖        | ✖              |
| 03-06-042  | 158               | 0  | 0           | 1           | 0           | 1            | 0            | 2          | 1          | 0                 | 1                  | Negative  | Negative  | Positive    | ✖                           | ✖         | ✖        | ✖              |
| 03-06-043  | 96                | 0  | 0           | 2           | 1           | 1            | 0            | 1          | 0          | 0                 | 0                  | Positive  | Positive  | Negative    | 1                           | 1         | 0        | 0              |
| 03-06-046  | 96                | 0  | 0           | 2           | 1           | 0            | 0            | 3          | 1          | 1                 | 0                  | Positive  | Positive  | Negative    | 1                           | 1         | 1        | 1              |
| 03-06-048  | 54                | 0  | 0           | 2           | 1           | 0            | 0            | 0          | 0          | 0                 | 0                  | Positive  | Positive  | Negative    | 1                           | 1         | 0        | 0              |
| 03-06-049  | 5                 | 0  | 0           | 1           | 0           | 0            | 0            | 0          | 0          | 0                 | 0                  | Negative  | Negative  | Negative    | 0                           | 0         | 0        | 0              |
| 03-06-050  | 95                | 0  | 0           | 1           | 0           | 0            | 0            | 0          | 0          | 0                 | 0                  | Positive  | Positive  | Negative    | 1                           | 0         | 0        | 0              |
| 03-06-052  | 92                | 1  | 1           | 3           | 1           | 2            | 1            | 1          | 0          | 0                 | 0                  | Positive  | Positive  | ✖           | 1                           | 1         | 0        | 0              |
| 03-06-053  | 95                | 0  | 0           | 3           | 1           | 2            | 1            | 1          | 0          | 0                 | 0                  | Positive  | Negative  | Negative    | 1                           | 1         | 0        | 0              |
| 03-06-055  | 77                | 1  | 1           | 1           | 0           | 0            | 0            | 1          | 0          | 0                 | 0                  | Positive  | Positive  | Negative    | 1                           | 0         | 0        | 0              |
| 03-07-001  | 70                | 0  | 0           | 0           | 0           | 0            | 0            | 0          | 0          | 0                 | 0                  | Positive  | Positive  | Negative    | 1                           | 0         | 0        | 0              |
| 03-07-002  | 62                | 0  | 0           | 0           | 0           | 0            | 0            | 1          | 0          | 0                 | 0                  | Positive  | Positive  | Negative    | 1                           | 0         | 0        | 0              |
| 03-07-005  | 131               | 0  | 0           | 0           | 0           | 3            | 1            | 2          | 1          | 0                 | 1                  | Positive  | Negative  | Negative    | ✖                           | ✖         | ✖        | ✖              |
| 03-07-006  | 31                | 1  | 1           | 1           | 0           | 0            | 0            | 1          | 0          | 0                 | 0                  | Positive  | Negative  | Positive    | 0                           | 0         | 0        | 0              |
| 03-07-007  | 66                | 0  | 0           | 0           | 0           | 0            | 0            | 0          | 0          | 0                 | 0                  | Positive  | Positive  | Negative    | 1                           | 0         | 0        | 0              |
| 03-07-008  | 69                | 0  | 0           | 0           | 0           | 2            | 1            | 0          | 0          | 0                 | 0                  | Positive  | Positive  | Negative    | 0                           | 0         | 0        | 0              |
| 03-07-009  | 68                | 0  | 0           | 0           | 0           | 0            | 0            | 1          | 0          | 0                 | 0                  | Positive  | Equivoca  | Negative    | 1                           | 0         | 0        | 0              |
| 03-07-011  | 60                | 0  | 0           | 0           | 0           | 1            | 0            | 0          | 0          | 0                 | 0                  | Positive  | Positive  | Negative    | 1                           | 0         | 0        | 0              |
| 03-07-012  | 63                | 0  | 0           | 0           | 0           | 0            | 0            | 0          | 0          | 0                 | 0                  | Positive  | Negative  | Negative    | 1                           | 0         | 0        | 0              |
| 03-07-014  | 65                | 0  | 0           | 1           | 0           | 0            | 0            | 0          | 0          | 0                 | 0                  | Positive  | Negative  | Positive    | 1                           | 0         | 0        | 0              |
| 03-07-015  | 177               | 0  | 0           | 1           | 0           | 1            | 0            | 0          | 0          | 0                 | 0                  | Positive  | Positive  | Negative    | 1                           | 0         | 0        | 0              |
| 03-07-016  | 61                | 0  | 0           | 0           | 0           | 0            | 0            | 1          | 0          | 0                 | 0                  | Positive  | Positive  | Negative    | 1                           | 0         | 0        | 0              |
| 03-07-019  | 64                | 0  | 0           | 0           | 0           | 2            | 1            | 0          | 0          | 0                 | 0                  | Positive  | Negative  | Negative    | 1                           | 0         | 0        | 0              |
| 03-07-020  | 60                | 0  | 0           | 0           | 0           | 0            | 0            | 0          | 0          | 0                 | 0                  | Positive  | Positive  | Negative    | ✖                           | ✖         | ✖        | ✖              |
| 03-07-022  | 59                | 0  | 0           | 2           | 1           | 0            | 0            | 0          | 0          | 0                 | 0                  | Positive  | Positive  | Negative    | 1                           | 1         | 0        | 0              |
| 03-07-024  | 47                | 0  | 0           | 0           | 0           | 2            | 1            | 0          | 0          | 0                 | 0                  | Positive  | Positive  | Negative    | 1                           | 0         | 0        | 0              |
| 03-07-026  | 63                | 0  | 0           | 1           | 0           | 0            | 0            | 0          | 0          | 0                 | 0                  | Positive  | Positive  | Positive    | 1                           | 0         | 0        | 0              |
| 03-07-029  | 66                | 0  | 0           | 2           | 1           | 0            | 0            | 1          | 0          | 0                 | 0                  | Negative  | Negative  | Negative    | 0                           | 0         | 0        | 0              |
| 03-07-031  | 66                | 0  | 0           | 1           | 0           | 0            | 0            | 0          | 0          | 0                 | 0                  | Positive  | Positive  | Negative    | 1                           | 0         | 0        | 0              |
| 03-07-032  | 60                | 0  | 0           | 1           | 0           | 1            | 0            | 0          | 0          | 0                 | 0                  | Positive  | Positive  | Positive    | 1                           | 0         | 0        | 0              |
| 03-07-033  | 59                | 0  | 0           | 0           | 0           | 0            | 0            | 0          | 0          | 0                 | 0                  | Positive  | Positive  | Negative    | 1                           | 0         | 0        | 0              |
| 03-07-036  | 63                | 0  | 0           | 0           | 0           | 0            | 0            | 1          | 0          | 0                 | 0                  | Positive  | Negative  | Negative    | 1                           | 0         | 0        | 0              |
| 03-07-040  | 71                | 0  | 0           | 0           | 0           | 0            | 0            | 0          | 0          | 0                 | 0                  | Positive  | Positive  | Positive    | 1                           | 0         | 0        | 0              |
| 03-07-042  | 63                | 0  | 0           | 0           | 0           | 1            | 0            | 0          | 0          | 0                 | 0                  | Positive  | Positive  | Negative    | 1                           | 0         | 0        | 0              |
| 03-07-044  | 63                | 0  | 0           | 0           | 0           | 0            | 0            | 0          | 0          | 0                 | 0                  | Positive  | Negative  | Negative    | 1                           | 0         | 0        | 0              |
| 03-07-048  | 62                | 0  | 0           | 1           | 0           | 1            | 0            | 1          | 0          | 0                 | 0                  | Positive  | Positive  | Positive    | 1                           | 0         | 0        | 0              |

Supplementary Table 1: Full dataset used in survival analyses (page 4)

| Patient ID | Followup (months) | OS | BrCa Events | IGF1R Score | IGF1R bin ‡ | pIGF1R Score | pIGF1R bin ‡ | SphK Score | SphK bin ‡ | IGF1R-SphK Comb ❖ | pIGF1R-SphK Comb ❖ | ER status | PR status | HER2 status | Anti-estrogen therapy (AET) | AET-IGF1R | AET-SphK | AET-IGF1R-SphK |
|------------|-------------------|----|-------------|-------------|-------------|--------------|--------------|------------|------------|-------------------|--------------------|-----------|-----------|-------------|-----------------------------|-----------|----------|----------------|
| 03-07-049  | 61                | 0  | 0           | 0           | 0           | 0            | 0            | 0          | 0          | 0                 | 0                  | Positive  | Positive  | Negative    | 1                           | 0         | 0        | 0              |
| 03-07-054  | 60                | 0  | 0           | 2           | 1           | 0            | 0            | 1          | 0          | 0                 | 0                  | Positive  | Positive  | Negative    | 1                           | 1         | 0        | 0              |
| 03-07-055  | 61                | 0  | 0           | 0           | 0           | 1            | 0            | 1          | 0          | 0                 | 0                  | Positive  | Positive  | Negative    | 1                           | 0         | 0        | 0              |
| 03-07-059  | 61                | 0  | 0           | 0           | 0           | 0            | 0            | 1          | 0          | 0                 | 0                  | Negative  | Negative  | Negative    | 0                           | 0         | 0        | 0              |
| 03-07-062  | 60                | 0  | 0           | 2           | 1           | 0            | 0            | 0          | 0          | 0                 | 0                  | Positive  | Positive  | Negative    | 1                           | 1         | 0        | 0              |
| 03-07-063  | 61                | 0  | 0           | 1           | 0           | 0            | 0            | 2          | 1          | 0                 | 0                  | Positive  | Positive  | Negative    | 1                           | 0         | 1        | 0              |
| 03-07-066  | 140               | 0  | 0           | 2           | 1           | 1            | 0            | 2          | 1          | 1                 | 0                  | Positive  | Positive  | Negative    | 1                           | 1         | 1        | 1              |
| 03-07-067  | 193               | 0  | 0           | 0           | 0           | 2            | 1            | 1          | 0          | 0                 | 0                  | Positive  | Negative  | Negative    | 1                           | 0         | 0        | 0              |
| 03-07-069  | 55                | 0  | 0           | 0           | 0           | 2            | 1            | 1          | 0          | 0                 | 0                  | Positive  | Positive  | Negative    | 1                           | 0         | 0        | 0              |
| 03-07-074  | 56                | 0  | 0           | 0           | 0           | 2            | 1            | 0          | 0          | 0                 | 0                  | Positive  | Positive  | Negative    | 1                           | 0         | 0        | 0              |
| 03-07-075  | 156               | 0  | 0           | 1           | 0           | 1            | 0            | 0          | 0          | 0                 | 0                  | Positive  | Positive  | ✖           | 1                           | 0         | 0        | 0              |
| 03-07-077  | 52                | 0  | 0           | 2           | 1           | 1            | 0            | 2          | 1          | 1                 | 0                  | Positive  | Positive  | Negative    | 0                           | 0         | 0        | 0              |
| 03-07-078  | 60                | 0  | 0           | 1           | 0           | 1            | 0            | 2          | 1          | 0                 | 0                  | Positive  | Positive  | Negative    | 1                           | 0         | 1        | 0              |
| 03-07-079  | 57                | 0  | 0           | 0           | 0           | 2            | 1            | 2          | 1          | 0                 | 1                  | Positive  | Positive  | Negative    | 1                           | 0         | 1        | 0              |
| 03-07-081  | 61                | 0  | 0           | 1           | 0           | 2            | 1            | 2          | 1          | 0                 | 1                  | Positive  | Negative  | Negative    | 1                           | 0         | 1        | 0              |
| 03-07-083  | 62                | 1  | 1           | 1           | 0           | 2            | 1            | 0          | 0          | 0                 | 0                  | Positive  | Negative  | Positive    | 1                           | 0         | 0        | 0              |
| 03-07-089  | 59                | 0  | 0           | 1           | 0           | 2            | 1            | 2          | 1          | 0                 | 1                  | Positive  | Positive  | Negative    | 1                           | 0         | 1        | 0              |
| 03-07-093  | 55                | 0  | 0           | 1           | 0           | 0            | 0            | 2          | 1          | 0                 | 0                  | Positive  | Positive  | Negative    | 1                           | 0         | 1        | 0              |
| 03-07-095  | 119               | 0  | 1           | 2           | 1           | 0            | 0            | 2          | 1          | 1                 | 0                  | Positive  | Positive  | Negative    | 1                           | 1         | 1        | 1              |
| 03-07-101  | 57                | 0  | 0           | 1           | 0           | 0            | 0            | 1          | 0          | 0                 | 0                  | Positive  | Negative  | Positive    | ✖                           | ✖         | ✖        | ✖              |
| 03-07-102  | 61                | 0  | 0           | 3           | 1           | 0            | 0            | 2          | 1          | 1                 | 0                  | Positive  | Negative  | Negative    | ✖                           | ✖         | ✖        | ✖              |
| 03-07-105  | 56                | 0  | 0           | 1           | 0           | 1            | 0            | 2          | 1          | 0                 | 0                  | Positive  | ✖         | Negative    | ✖                           | ✖         | ✖        | ✖              |
| 03-07-106  | 59                | 0  | 0           | 0           | 0           | 0            | 0            | 3          | 1          | 0                 | 0                  | Positive  | Positive  | Negative    | 1                           | 0         | 0        | 0              |
| 03-07-110  | 50                | 0  | 0           | 0           | 0           | 0            | 0            | 1          | 0          | 0                 | 0                  | Positive  | Positive  | Negative    | 1                           | 0         | 0        | 0              |
| 03-07-112  | 58                | 0  | 0           | 1           | 0           | 1            | 0            | 2          | 1          | 0                 | 0                  | Positive  | Negative  | Positive    | 1                           | 0         | 1        | 0              |
| 03-07-113  | 61                | 0  | 0           | 0           | 0           | 0            | 0            | 2          | 1          | 0                 | 0                  | Positive  | Positive  | Negative    | ✖                           | ✖         | ✖        | ✖              |
| 03-07-115  | 53                | 0  | 0           | 0           | 0           | 0            | 0            | 2          | 1          | 0                 | 0                  | Negative  | Negative  | Negative    | 0                           | 0         | 0        | 0              |
| 03-07-116  | 27                | 0  | 0           | 2           | 1           | 0            | 0            | 1          | 0          | 0                 | 0                  | Positive  | Positive  | Positive    | 1                           | 1         | 0        | 0              |
| 03-07-117  | 57                | 0  | 0           | 0           | 0           | 1            | 0            | 0          | 0          | 0                 | 0                  | Negative  | Negative  | Positive    | 0                           | 0         | 0        | 0              |
| 03-07-118  | 50                | 0  | 0           | 1           | 0           | 2            | 1            | 0          | 0          | 0                 | 0                  | Positive  | Positive  | Negative    | 1                           | 0         | 0        | 0              |
| 03-07-120  | 61                | 0  | 0           | 1           | 0           | 0            | 0            | 1          | 0          | 0                 | 0                  | Positive  | Positive  | Positive    | 1                           | 0         | 0        | 0              |
| 03-07-121  | 55                | 0  | 0           | 1           | 0           | 3            | 1            | 0          | 0          | 0                 | 0                  | Positive  | Positive  | Negative    | 1                           | 0         | 0        | 0              |
| 03-08-008  | 93                | 1  | 1           | 0           | 0           | 0            | 0            | 1          | 0          | 0                 | 0                  | Negative  | Negative  | Positive    | 0                           | 0         | 0        | 0              |
| 03-08-009  | 59                | 0  | 0           | 2           | 1           | 2            | 1            | 0          | 0          | 0                 | 0                  | Positive  | Positive  | Negative    | 1                           | 1         | 0        | 0              |
| 03-08-010  | 36                | 0  | 0           | 1           | 0           | 3            | 1            | 0          | 0          | 0                 | 0                  | Positive  | Positive  | Negative    | ✖                           | ✖         | ✖        | ✖              |
| 03-08-015  | 58                | 0  | 0           | 0           | 0           | 1            | 0            | 0          | 0          | 0                 | 0                  | Positive  | Positive  | Negative    | 1                           | 0         | 0        | 0              |
| 03-08-022  | 144               | 0  | 0           | 2           | 1           | 2            | 1            | 2          | 1          | 1                 | 1                  | Positive  | Positive  | Negative    | 1                           | 1         | 1        | 1              |
| 03-08-032  | 18                | 0  | 0           | 0           | 0           | 0            | 0            | 3          | 1          | 0                 | 0                  | Positive  | Positive  | Negative    | ✖                           | ✖         | ✖        | ✖              |
| 03-08-036  | 12                | 0  | 0           | 1           | 0           | 0            | 0            | 0          | 0          | 0                 | 0                  | Positive  | Positive  | Negative    | 1                           | 0         | 0        | 0              |
| 03-08-043  | 60                | 0  | 0           | 1           | 0           | 0            | 0            | 0          | 0          | 0                 | 0                  | Positive  | Positive  | Negative    | 1                           | 0         | 0        | 0              |
| 03-08-047  | 12                | 0  | 0           | 1           | 0           | 0            | 0            | 0          | 0          | 0                 | 0                  | Positive  | Positive  | Positive    | 1                           | 0         | 0        | 0              |
| 03-08-049  | 74                | 0  | 0           | 2           | 1           | 0            | 0            | 2          | 1          | 1                 | 0                  | Positive  | Positive  | Negative    | 1                           | 1         | 1        | 1              |
| 03-08-072  | 62                | 0  | 0           | 0           | 0           | 2            | 1            | 3          | 1          | 0                 | 1                  | Positive  | Positive  | Negative    | 1                           | 0         | 1        | 0              |
| 03-08-075  | 59                | 0  | 0           | 0           | 0           | 0            | 0            | 1          | 0          | 0                 | 0                  | Positive  | Positive  | Positive    | 1                           | 0         | 0        | 0              |
| 03-08-077  | 25                | 0  | 0           | 2           | 1           | 2            | 1            | 3          | 1          | 1                 | 1                  | Positive  | Positive  | Negative    | 1                           | 1         | 1        | 1              |
| 03-08-078  | 292               | 1  | 0           | 0           | 0           | 3            | 1            | 2          | 1          | 0                 | 1                  | Positive  | Negative  | Negative    | 1                           | 0         | 1        | 0              |
| 03-08-085  | 60                | 0  | 0           | 0           | 0           | 0            | 0            | 3          | 1          | 0                 | 0                  | Negative  | Negative  | Positive    | 1                           | 0         | 1        | 0              |
| 03-08-109  | 58                | 0  | 0           | 0           | 0           | 0            | 0            | 2          | 1          | 0                 | 0                  | Positive  | Positive  | Positive    | 1                           | 0         | 1        | 0              |

Supplementary Table 1: Full dataset used in survival analyses (page 5)

| Patient ID | Followup (months) | OS | BrCa Events | IGF1R Score | IGF1R bin ‡ | pIGF1R Score | pIGF1R bin ‡ | SphK Score | SphK bin ‡ | IGF1R-SphK Comb ♦ | pIGF1R-SphK Comb ♦ | ER status | PR status | HER2 status | Anti-estrogen therapy (AET) | AET-IGF1R | AET-SphK | AET-IGF1R-SphK |
|------------|-------------------|----|-------------|-------------|-------------|--------------|--------------|------------|------------|-------------------|--------------------|-----------|-----------|-------------|-----------------------------|-----------|----------|----------------|
| 03-08-125  | 61                | 0  | 0           | 2           | 1           | 1            | 0            | 2          | 1          | 1                 | 0                  | Positive  | Positive  | Negative    | 1                           | 1         | 1        | 1              |
| 03-08-126  | 58                | 0  | 0           | 2           | 1           | 0            | 0            | 2          | 1          | 1                 | 0                  | Positive  | Positive  | Positive    | 1                           | 1         | 1        | 1              |
| 03-08-130  | 67                | 0  | 0           | 0           | 0           | 0            | 0            | 2          | 1          | 0                 | 0                  | Positive  | Equivoca  | Positive    | 1                           | 0         | 1        | 0              |
| 03-09-007  | 72                | 0  | 0           | 0           | 0           | 0            | 0            | 2          | 1          | 0                 | 0                  | Negative  | Negative  | Negative    | 0                           | 0         | 0        | 0              |
| 03-09-020  | 61                | 0  | 0           | 2           | 1           | 3            | 1            | 3          | 1          | 1                 | 1                  | Positive  | Positive  | Negative    | 1                           | 1         | 1        | 1              |
| 03-09-022  | 61                | 0  | 0           | 2           | 1           | 3            | 1            | 3          | 1          | 1                 | 1                  | Positive  | Positive  | Negative    | 1                           | 1         | 1        | 1              |
| 03-09-026  | 167               | 0  | 0           | 0           | 0           | 2            | 1            | 1          | 0          | 0                 | 0                  | Positive  | Positive  | Negative    | 1                           | 0         | 0        | 0              |
| 03-09-027  | 60                | 0  | 0           | 0           | 0           | 0            | 0            | 3          | 1          | 0                 | 0                  | Negative  | Negative  | Negative    | ✖                           | ✖         | ✖        | ✖              |
| 03-09-029  | 60                | 0  | 0           | 2           | 1           | 0            | 0            | 2          | 1          | 1                 | 0                  | Positive  | Positive  | Positive    | 1                           | 1         | 1        | 1              |
| 03-09-032  | 59                | 0  | 0           | 1           | 0           | 0            | 0            | 1          | 0          | 0                 | 0                  | Positive  | Positive  | Positive    | 1                           | 0         | 0        | 0              |
| 03-09-034  | 60                | 0  | 0           | 0           | 0           | 2            | 1            | 2          | 1          | 0                 | 1                  | Positive  | Positive  | Negative    | 1                           | 0         | 1        | 0              |
| 03-09-035  | 60                | 0  | 0           | 0           | 0           | 0            | 0            | 1          | 0          | 0                 | 0                  | Positive  | Positive  | Positive    | 1                           | 0         | 0        | 0              |
| 03-09-041  | 61                | 0  | 0           | 1           | 0           | 0            | 0            | 3          | 1          | 0                 | 0                  | Positive  | Negative  | Negative    | 1                           | 0         | 1        | 0              |
| 03-09-077  | 60                | 0  | 0           | 0           | 0           | 1            | 0            | 2          | 1          | 0                 | 0                  | Positive  | Positive  | Negative    | 1                           | 0         | 1        | 0              |
| 03-09-117  | 63                | 0  | 0           | 1           | 0           | 0            | 0            | 2          | 1          | 0                 | 0                  | Negative  | Negative  | Negative    | ✖                           | ✖         | ✖        | ✖              |
| 03-09-148  | 60                | 0  | 0           | 2           | 1           | 1            | 0            | 3          | 1          | 1                 | 0                  | Negative  | Negative  | Negative    | 0                           | 0         | 0        | 0              |
| 04-07-006  | 61                | 0  | *           | 0           | 0           | 2            | 1            | 2          | 1          | 0                 | 1                  | Negative  | Negative  | Negative    | ✖                           | ✖         | ✖        | ✖              |
| 04-07-012  | 78                | 0  | 0           | 1           | 0           | 3            | 1            | 3          | 1          | 0                 | 1                  | Positive  | Positive  | Negative    | 1                           | 0         | 0        | 0              |
| 04-07-016  | 71                | 0  | 0           | 0           | 0           | 3            | 1            | 2          | 1          | 0                 | 1                  | Positive  | Positive  | Negative    | 1                           | 0         | 0        | 0              |
| 04-07-046  | 3                 | 1  | 0           | 1           | 0           | 0            | 0            | 2          | 1          | 0                 | 0                  | Positive  | Negative  | Positive    | 0                           | 0         | 0        | 0              |
| 04-07-060  | 61                | 0  | 1           | 0           | 0           | 1            | 0            | 1          | 0          | 0                 | 0                  | Negative  | Negative  | Negative    | 1                           | 0         | 0        | 0              |
| 04-07-065  | 42                | 0  | 0           | 1           | 0           | 1            | 0            | 0          | 0          | 0                 | 0                  | Negative  | Negative  | Positive    | 0                           | 0         | 0        | 0              |
| 04-07-071  | 42                | 0  | 0           | 1           | 0           | 0            | 0            | 0          | 0          | 0                 | 0                  | Negative  | Negative  | Positive    | 0                           | 0         | 0        | 0              |
| 04-07-072  | 59                | 0  | 0           | 1           | 0           | 0            | 0            | 2          | 1          | 0                 | 0                  | Positive  | Negative  | Positive    | 1                           | 0         | 1        | 0              |
| 04-08-002  | 37                | 0  | 0           | 1           | 0           | 0            | 0            | 1          | 0          | 0                 | 0                  | Positive  | Positive  | Positive    | 1                           | 0         | 0        | 0              |
| 04-08-025  | 47                | 0  | 0           | 0           | 0           | 0            | 0            | 1          | 0          | 0                 | 0                  | Negative  | Negative  | Positive    | 0                           | 0         | 0        | 0              |
| 04-08-057  | 4                 | 0  | 0           | 1           | 0           | 0            | 0            | 2          | 1          | 0                 | 0                  | Positive  | Positive  | Positive    | ✖                           | ✖         | ✖        | ✖              |
| 04-08-061  | 61                | 0  | 0           | 2           | 1           | 1            | 0            | 1          | 0          | 0                 | 0                  | Positive  | Positive  | Positive    | 1                           | 1         | 0        | 0              |
| 04-08-085  | 30                | 0  | 0           | 2           | 1           | 1            | 0            | 2          | 1          | 1                 | 0                  | Positive  | Positive  | Positive    | 1                           | 1         | 1        | 1              |
| 04-08-136  | 29                | 0  | 0           | 0           | 0           | 0            | 0            | 0          | 0          | 0                 | 0                  | Negative  | Negative  | Positive    | 0                           | 0         | 0        | 0              |
| 04-08-182  | 22                | 0  | 0           | 1           | 0           | 1            | 0            | 2          | 1          | 0                 | 0                  | Positive  | Negative  | Positive    | 0                           | 0         | 0        | 0              |
| 04-08-215  | 30                | 0  | *           | 1           | 0           | 1            | 0            | 0          | 0          | 0                 | 0                  | Positive  | Positive  | Positive    | 0                           | 0         | 0        | 0              |
| 04-09-016  | 29                | 0  | 0           | 0           | 0           | 0            | 0            | 1          | 0          | 0                 | 0                  | Positive  | Positive  | Positive    | 0                           | 0         | 0        | 0              |
| 05-07-001  | 60                | 0  | 0           | 2           | 1           | 3            | 1            | 2          | 1          | 1                 | 1                  | Negative  | Positive  | Positive    | 1                           | 1         | 1        | 1              |
| 05-07-013  | 67                | 1  | 1           | 1           | 0           | 1            | 0            | 0          | 0          | 0                 | 0                  | Positive  | Positive  | Positive    | 1                           | 0         | 0        | 0              |
| 05-07-020  | 59                | 0  | 0           | 0           | 0           | 0            | 0            | 0          | 0          | 0                 | 0                  | Negative  | Negative  | Negative    | 0                           | 0         | 0        | 0              |
| 05-07-028  | 67                | 0  | 0           | 1           | 0           | 0            | 0            | 1          | 0          | 0                 | 0                  | Negative  | Negative  | Positive    | 0                           | 0         | 0        | 0              |
| 05-07-033  | 62                | 0  | 0           | 1           | 0           | 0            | 0            | 2          | 1          | 0                 | 0                  | Negative  | Positive  | Positive    | 1                           | 0         | 1        | 0              |
| 05-07-037  | 61                | 0  | 0           | 1           | 0           | 0            | 0            | 1          | 0          | 0                 | 0                  | Positive  | Positive  | Positive    | 1                           | 0         | 0        | 0              |
| 05-07-053  | 59                | 0  | 0           | 1           | 0           | 0            | 0            | 1          | 0          | 0                 | 0                  | Positive  | Positive  | Positive    | 1                           | 0         | 0        | 0              |
| 05-07-108  | 30                | 0  | 0           | 0           | 0           | 1            | 0            | 2          | 1          | 0                 | 0                  | Negative  | Negative  | Negative    | ✖                           | ✖         | ✖        | ✖              |
| 05-07-130  | 55                | 0  | 0           | 0           | 0           | 1            | 1            | 2          | 1          | 0                 | 1                  | Negative  | Negative  | Positive    | 0                           | 0         | 0        | 0              |
| 06-08-004  | 63                | 0  | 0           | 0           | 0           | 0            | 0            | 3          | 1          | 0                 | 0                  | Negative  | Negative  | Negative    | 0                           | 0         | 0        | 0              |

\*: Alive - disease status unknown

‡: Binary score where 0 or 1 = low (0); 2 or 3 = high(1)

♦: Combined score where none or one high = 0; both high = 1

✖: Data unavailable
